# Supplementary material for: Exploring Undergraduate Biochemistry Students’ Gesture Production Through an Embodied Framework
Source: Atypon-hosted journal article supplement (doi:10.1187/cbe.23-06-0106), 2024-04-15
Supplement: combinedsupmats.pdf [file combinedsupmats.pdf]

# Supplemental Material

*CBE—Life Sciences Education*

Randa *et al.*

## Supplementary material

**Table S1.** Interview protocol

|                                                             |                                                                                                                                                                                                                                                                                                                                                                                                                                                                                                                                                                                                                                                                                                                                                                                             |
|-------------------------------------------------------------|---------------------------------------------------------------------------------------------------------------------------------------------------------------------------------------------------------------------------------------------------------------------------------------------------------------------------------------------------------------------------------------------------------------------------------------------------------------------------------------------------------------------------------------------------------------------------------------------------------------------------------------------------------------------------------------------------------------------------------------------------------------------------------------------|
| <p>Section 1<br/><i>Introductory Questions</i></p>          | <p>Consider the following functional groups/protein structures. Would you expect the following molecules to stabilize or destabilize a <math>K^+</math> ion in the center of a membrane bilayer? Briefly explain your answers.</p> <ol style="list-style-type: none"> <li>C-terminus of an alpha helix</li> <li>N-terminus of an alpha helix</li> <li>Water molecules</li> <li>Hydrophobic molecules</li> <li>Basic amino acid side chains (like Lys, Arg)</li> <li>Acidic amino acid side chains (like Glu, Asp)</li> </ol>                                                                                                                                                                                                                                                                |
|                                                             | <p>Keep in mind that MacKinnon and colleagues observed that the <math>K^+</math> ions are able to traverse very rapidly through the channel, indicating that they were not bound too tightly in the internal pore / cavity. At the same time, the cavity is wide enough to accommodate water molecules in addition to a <math>K^+</math> ion. After leaving the cavity, the internal pore constricts such that any ion entering the selectivity filter must completely dehydrate.</p> <ol style="list-style-type: none"> <li>With the above information, could you propose a model of how the <math>K^+</math> ions traverse through the channel?</li> <li>Can metal ions smaller than <math>K^+</math>, for example <math>Na^+</math> ions, pass through the KcsA channel? Why?</li> </ol> |
| <p>Section 2<br/><i>Getting familiar with BiochemAR</i></p> | <p>Have you used BioChemAR before? Take your time to look over the structure and familiarize yourself with the color key.</p>                                                                                                                                                                                                                                                                                                                                                                                                                                                                                                                                                                                                                                                               |
|                                                             | <p>Could you describe the structures that you see?</p>                                                                                                                                                                                                                                                                                                                                                                                                                                                                                                                                                                                                                                                                                                                                      |
| <p>Section 3<br/><i>Revisiting previous models</i></p>      | <p>Now let's revisit your hypotheses. Does what you see in the structure support or disprove your hypotheses with regards to the molecular elements you thought about in Q1? (Ask them to use the model explicitly to justify their answer)</p>                                                                                                                                                                                                                                                                                                                                                                                                                                                                                                                                             |
|                                                             | <p>Does what you see in the structure support or disprove your hypothesis with regards to your proposed model for <math>K^+</math> channel function in Q2? (Ask about both how the <math>K^+</math> ion traverse and whether the sodium ion passes through)</p> <ol style="list-style-type: none"> <li>If support: how does the structure support your hypothesis?</li> <li>If disprove: why do you think it disproves your hypothesis? How would you change your original hypothesis. Why do you think the structure support your alternative hypothesis?</li> </ol>                                                                                                                                                                                                                       |

**Table S2.** Description of student produced gestures, grouped by topic and motion type. In the case of certain gestures that were used across multiple topics, the gesture name is followed by an abbreviation of the topic name.

| Topic                  | Moton Type | Gesture Name   | Description                                                                                                                                                                                              |
|------------------------|------------|----------------|----------------------------------------------------------------------------------------------------------------------------------------------------------------------------------------------------------|
| Ion depiction (ID)     | Motion     | Air drawing ID | One or both hands are used to "draw" a specific image in the air                                                                                                                                         |
|                        |            | Claw           | Hand is curved, but open, almost like holding a ball                                                                                                                                                     |
|                        | Static     | Fist           | All fingers curve in tightly into palm                                                                                                                                                                   |
|                        |            | Hang loose     | Thumb and pinky are extended with all other fingers closed. Hand may rotate or shake back and forth with emphasis                                                                                        |
|                        |            | Pinch          | Thumb and pointer come about an inch apart (pinching motion)                                                                                                                                             |
| Channel Depiction (CD) | Motion     | Air drawing CD | One or both hands are used to "draw" a specific image in the air                                                                                                                                         |
|                        |            | Attract CD     | One hand pushes into the other                                                                                                                                                                           |
|                        |            | Chop CD        | Hand(s) make one or more small chopping motions                                                                                                                                                          |
|                        |            | Clap           | Both hands come together in a clapping motion                                                                                                                                                            |
|                        |            | Collapse CD    | Both hands are in open formation and move inwards towards each other                                                                                                                                     |
|                        |            | Come on CD     | Hand makes a big sweeping curved motion that may involve arm, sort of like "come on"                                                                                                                     |
|                        |            | Up and down CD | Vertical motion that encompasses either the hand moving from top to bottom or bottom to top or repeatedly                                                                                                |
|                        |            | Exit           | Hand quickly moves away from body (and possibly off-screen)                                                                                                                                              |
|                        |            | Expansion CD   | <b>ITALIAN PINCH:</b> All fingers come together, but palm of hand is open; both hands move away from each other<br><b>FINGERS:</b> 2 fingers move towards and away from each other                       |
|                        |            | Insert CD      | One hand is placed into a previously formed shape, made by the other hand                                                                                                                                |
|                        |            | Pinball CD     | Both hands simultaneously flap back and forth, hinging at the wrists                                                                                                                                     |
|                        |            | Pulsing        | <b>BOWL:</b> Both hands (palms facing one another) move closer and away from one another repeatedly<br><b>CLAWS:</b> Both hands (held in "claw" shapes) move closer and away from one another repeatedly |

|                             |                       |                                                                                                                                                                                                                                                                                                                                                                                                 |
|-----------------------------|-----------------------|-------------------------------------------------------------------------------------------------------------------------------------------------------------------------------------------------------------------------------------------------------------------------------------------------------------------------------------------------------------------------------------------------|
|                             |                       | <p><b>PINCH:</b> Both hands make pinching gesture, and move closer and away from each other repeatedly</p> <p><b>POINT CD:</b> both hands (index fingers extended) move closer and away from one another repeatedly</p> <p><b>SHEETS CD:</b> Both hands are horizontal (palms facing torso), with one hand stacked behind the other. Hands move closer and away from one another repeatedly</p> |
|                             | Rainbow CD            | Hand/hands open outwards and arc down                                                                                                                                                                                                                                                                                                                                                           |
|                             | Repel                 | Hand "bounces" towards opposite hand, which causes opposite hand to move away                                                                                                                                                                                                                                                                                                                   |
|                             | Ring CD               | Pointer finger draws a circular figure which may be oriented horizontally or vertically                                                                                                                                                                                                                                                                                                         |
|                             | Screw in lightbulb CD | Hand is in a C shape and rotates                                                                                                                                                                                                                                                                                                                                                                |
|                             | So so                 | Hand rotates loosely back and forth (horizontal plane)                                                                                                                                                                                                                                                                                                                                          |
|                             | Open bowl CD          | Both hands are set slightly apart, make curved bowl gesture; may or may not move back and forth                                                                                                                                                                                                                                                                                                 |
| Either/Or                   | Piano CD              | One or two hands are raised and held horizontally. They move back and forth and/or up and down slightly.                                                                                                                                                                                                                                                                                        |
|                             | Pinch CD              | Thumb and pointer come about an inch apart (pinching motion)                                                                                                                                                                                                                                                                                                                                    |
|                             | Stack CD              | <b>PINCH:</b> Both hands make pinching gesture (index and thumb about an inch apart), with pinches closely stacked on top of one another                                                                                                                                                                                                                                                        |
|                             | Double hand mug       | Both hands face one another in an open formation (small ball/thermos).                                                                                                                                                                                                                                                                                                                          |
| Static                      | Hang loose CD         | Thumb and pinky are extended with all other fingers closed. Hand may rotate or shake back and forth with emphasis                                                                                                                                                                                                                                                                               |
|                             | Italian pinch CD      | All fingers come together, but palm of hand is open                                                                                                                                                                                                                                                                                                                                             |
| Movement through space (MS) | Attract MS            | One hand pushes into the other                                                                                                                                                                                                                                                                                                                                                                  |
|                             | Down and Up MS        | Hand starts from lower and quickly raises up                                                                                                                                                                                                                                                                                                                                                    |
|                             | Italian pinch MS      | All fingers come together, but palm of hand is open                                                                                                                                                                                                                                                                                                                                             |
| Motion                      | Lever                 | Hand shifts from vertical to horizontal orientation                                                                                                                                                                                                                                                                                                                                             |
|                             | Membrane move MS      | Forearm is horizontal, showing the membrane of the cell. The pointer finger of the other hand then moves up and down repeatedly.                                                                                                                                                                                                                                                                |
|                             | Pinball MS            | Both hands simultaneously flap back and forth, hinging at the wrists                                                                                                                                                                                                                                                                                                                            |

|                                |                |                                                                                                                         |                                                                                                                                                                                                          |
|--------------------------------|----------------|-------------------------------------------------------------------------------------------------------------------------|----------------------------------------------------------------------------------------------------------------------------------------------------------------------------------------------------------|
|                                | Push           | One or both hands (palms facing toward the screen) physically push forwards.                                            |                                                                                                                                                                                                          |
|                                | Seatbelt       | Moving one hand diagonally (from shoulder across body) behind the other hand                                            |                                                                                                                                                                                                          |
|                                | Tide MS        | Hand makes a small push downwards and towards the camera, palm down (resembles a rolling wave)                          |                                                                                                                                                                                                          |
|                                | Trace MS       | Index finger traces a line or other shape that aligns with dialogue. Other hand may or may not be involved in "staging" |                                                                                                                                                                                                          |
|                                | Up and Down MS | Vertical motion that encompasses either the hand moving from top to bottom or bottom to top or repeatedly               |                                                                                                                                                                                                          |
|                                | Zoom           | Hand briefly moves in towards the center before dropping off camera                                                     |                                                                                                                                                                                                          |
| Either/Or                      | Pointing MS    | Finger of hand points in an intentional direction; may or may not move as well                                          |                                                                                                                                                                                                          |
| Static                         | Bracket MS     | Finger bracket: thumb and pointer finger make bracket shape, rest of hand is in a fist                                  |                                                                                                                                                                                                          |
| Charge-charge interaction (CC) | Air drawing CC | One or both hands are used to "draw" a specific image in the air                                                        |                                                                                                                                                                                                          |
|                                | Attract CC     | One hand pushes into the other                                                                                          |                                                                                                                                                                                                          |
|                                | Chop CC        | Hand(s) make one or more small chopping motions                                                                         |                                                                                                                                                                                                          |
|                                | Clap           | Both hands come together in a clapping motion                                                                           |                                                                                                                                                                                                          |
|                                | Collapse CC    | Both hands are in open formation and move inwards towards each other                                                    |                                                                                                                                                                                                          |
|                                | Come on CC     | Hand makes a big sweeping curved motion that may involve arm, sort of like "come on"                                    |                                                                                                                                                                                                          |
|                                | Up and down CC | Vertical motion that encompasses either the hand moving from top to bottom or bottom to top or repeatedly               |                                                                                                                                                                                                          |
|                                | Motion         | Exit                                                                                                                    | Hand quickly moves away from body (and possibly off-screen)                                                                                                                                              |
|                                |                | Expansion CC                                                                                                            | <b>ITALIAN PINCH:</b> All fingers come together, but palm of hand is open; both hands move away from each other<br><b>FINGERS:</b> 2 fingers move towards and away from each other                       |
|                                |                | Insert CC                                                                                                               | One hand is placed into a previously formed shape, made by the other hand                                                                                                                                |
|                                |                | Pinball CC                                                                                                              | Both hands simultaneously flap back and forth, hinging at the wrists                                                                                                                                     |
|                                |                | Pulsing                                                                                                                 | <b>BOWL:</b> Both hands (palms facing one another) move closer and away from one another repeatedly<br><b>CLAWS:</b> Both hands (held in "claw" shapes) move closer and away from one another repeatedly |

|                              |                       |                                                                                                                                                                                                                                                                                                                                                                                                 |
|------------------------------|-----------------------|-------------------------------------------------------------------------------------------------------------------------------------------------------------------------------------------------------------------------------------------------------------------------------------------------------------------------------------------------------------------------------------------------|
|                              |                       | <p><b>PINCH:</b> Both hands make pinching gesture, and move closer and away from each other repeatedly</p> <p><b>POINT CC:</b> both hands (index fingers extended) move closer and away from one another repeatedly</p> <p><b>SHEETS CC:</b> Both hands are horizontal (palms facing torso), with one hand stacked behind the other. Hands move closer and away from one another repeatedly</p> |
|                              | Rainbow CC            | Hand/hands open outwards and arc down                                                                                                                                                                                                                                                                                                                                                           |
|                              | Repel                 | Hand "bounces" towards opposite hand, which causes opposite hand to move away                                                                                                                                                                                                                                                                                                                   |
|                              | Ring CC               | Pointer finger draws a circular figure which may be oriented horizontally or vertically                                                                                                                                                                                                                                                                                                         |
|                              | Screw in lightbulb CC | Hand is in a C shape and rotates                                                                                                                                                                                                                                                                                                                                                                |
|                              | So so                 | Hand rotates loosely back and forth (horizontal plane)                                                                                                                                                                                                                                                                                                                                          |
|                              | Open bowl CC          | Both hands are set slightly apart, make curved bowl gesture; may or may not move back and forth                                                                                                                                                                                                                                                                                                 |
| Either/Or                    | Piano CC              | One or two hands are raised and held horizontally. They move back and forth and/or up and down slightly.                                                                                                                                                                                                                                                                                        |
|                              | Pinch CC              | Thumb and pointer come about an inch apart (pinching motion)                                                                                                                                                                                                                                                                                                                                    |
|                              | Stack CC              | <b>PINCH:</b> Both hands make pinching gesture (index and thumb about an inch apart), with pinches closely stacked on top of one another                                                                                                                                                                                                                                                        |
|                              | Double hand mug       | Both hands face one another in an open formation (small ball/thermos).                                                                                                                                                                                                                                                                                                                          |
| Static                       | Hang loose CC         | Thumb and pinky are extended with all other fingers closed. Hand may rotate or shake back and forth with emphasis                                                                                                                                                                                                                                                                               |
|                              | Italian pinch CC      | All fingers come together, but palm of hand is open                                                                                                                                                                                                                                                                                                                                             |
| Channel-ion interaction (CI) | Attract CI            | One hand pushes into the other                                                                                                                                                                                                                                                                                                                                                                  |
|                              | Boundary              | Hand(s) is held flat (either horizontally or vertically), then repeatedly moves in a linear back and forth motion to define a line/plane/level                                                                                                                                                                                                                                                  |
|                              | Chop CI               | Hand(s) make one or more small chopping motions                                                                                                                                                                                                                                                                                                                                                 |
|                              | Collapse CI           | Both hands are in open formation and move inwards towards each other                                                                                                                                                                                                                                                                                                                            |
|                              | Come on CI            | Hand makes a big sweeping curved motion that involves arm, sort of like "come on"                                                                                                                                                                                                                                                                                                               |

|           |                       |                                                                                                                                                                  |
|-----------|-----------------------|------------------------------------------------------------------------------------------------------------------------------------------------------------------|
|           | Down and up CI        | Single hand raises and lowers, with fingers held vertically                                                                                                      |
|           | Expansion CI          | Hands expand outwards                                                                                                                                            |
|           | Flash CI              | Fingers are constricted, then expand outwards in a flashing movement                                                                                             |
|           | Insert CI             | One hand is placed into a previously formed shape, made by the other hand                                                                                        |
|           | Platform shift CI     | Single hand is held flat; may or may not move up and down                                                                                                        |
|           | Pulsing               | <b>Pinch ci:</b> both hands make pinching gesture, and move closer and away from each other repeatedly                                                           |
|           |                       | <b>POINT CI:</b> both hands (index fingers extended) move closer and away from one another repeatedly                                                            |
|           |                       | <b>SHEETS CI:</b> Both hands are horizontal (palms facing torso), with one hand stacked behind the other. Hands move closer and away from one another repeatedly |
|           | Rainbow CI            | Hand/hands open outwards and arc down                                                                                                                            |
|           | Ring CI               | Pointer finger draws a circular figure which may be oriented horizontally or vertically                                                                          |
|           | Screw in lightbulb CI | Hand is in a C shape and rotates                                                                                                                                 |
|           | Tube CI               | Hand(s) makes a C shape and moves up and down vertically to illustrate barrel shape                                                                              |
|           |                       | <b>INSIDE OUT:</b> arm is extended with hand twisted and curled outward with C shape                                                                             |
|           | Trace CI              | Index finger traces a line or other shape that aligns with dialogue. Other hand may or may not be involved in "staging"                                          |
|           | Up and down CI        | Vertical motion that encompasses either the hand moving from top to bottom or bottom to top or repeatedly                                                        |
| Either/or | Open bowl ci          | Both hands are set slightly apart, make curved bowl gesture; may or may not move back and forth                                                                  |
|           | Stack CI              | <b>PINCH:</b> Both hands make pinching gesture (index and thumb about an inch apart), with pinches closely stacked on top of one another                         |
|           | Vertical pipe CI      | Hands are vertical, parallel to each other and set apart, they may or may not move.                                                                              |
| Static    | Ball                  | Hands constrict into rounded open ball shape                                                                                                                     |
|           | Italian pinch CI      | All fingers come together, but palm of hand is open                                                                                                              |
|           | Ok ci                 | Thumb and index fingers make a circle. Other fingers are open                                                                                                    |

|            |                |                                                                                          |                                                                                                                                                                                                 |                                                                                            |
|------------|----------------|------------------------------------------------------------------------------------------|-------------------------------------------------------------------------------------------------------------------------------------------------------------------------------------------------|--------------------------------------------------------------------------------------------|
|            |                | Open O CI                                                                                | One or both hand forms a round "O" shape.                                                                                                                                                       |                                                                                            |
|            |                | Piano CI                                                                                 | One or two hands are raised and held horizontally. They move back and forth and/or up and down slightly.                                                                                        |                                                                                            |
| Levels (L) | Either/Or      | Boundary                                                                                 | Hand(s) is held flat (either horizontally or vertically), then repeatedly moves in a linear back and forth motion to define a line/plane/level                                                  |                                                                                            |
|            |                | Decline                                                                                  | Hand travels downwards, led by fingers, in a diagonal motion (palm facing down); hand may also be laid in a straight diagonal line (fingers pointing downward)                                  |                                                                                            |
|            |                | Expansion L                                                                              | Hands are held at a slight distance, then move outwards and away from one another                                                                                                               |                                                                                            |
|            |                | Incline                                                                                  | Hand travels upwards, lead by fingers, in a diagonal motion (palm facing down); hand may also be laid in a straight diagonal line (fingers pointing upward)                                     |                                                                                            |
|            |                | Platform shift L                                                                         | Single hand is held flat horizontally; may or may not move up and down                                                                                                                          |                                                                                            |
|            |                | Pointing L                                                                               | Finger of hand points in an intentional direction; may or may not move towards aforementioned direction                                                                                         |                                                                                            |
|            |                | Spatial relationships (SR)                                                               | Attract SR                                                                                                                                                                                      | One hand pushes into the other                                                             |
|            |                |                                                                                          | Collapse SR                                                                                                                                                                                     | Both hands are in open formation (palms facing camera) and move inwards towards each other |
|            | Down and up SR | Hand starts from lower and quickly raises up                                             |                                                                                                                                                                                                 |                                                                                            |
|            | Expansion SR   | Hands expand outwards<br><b>FINGERS:</b> 2 fingers move towards and away from each other |                                                                                                                                                                                                 |                                                                                            |
|            | Motion         | Flip                                                                                     | <b>Peace:</b> left index and middle finger are extended. Wrist then rotates to switch orientation of these two fingers<br><b>PINCH:</b> fingers held in a pinch shape, hand flips along an axis |                                                                                            |
|            |                | Platform shift SR                                                                        | Single hand is held flat; may or may not move up and down                                                                                                                                       |                                                                                            |
|            |                | Pulsing                                                                                  | <b>Bowl:</b> both hands (palms facing one another) move closer and away from one another repeatedly                                                                                             |                                                                                            |
|            |                | Ring SR                                                                                  | Pointer finger draws a circular figure which may be oriented horizontally or vertically                                                                                                         |                                                                                            |
|            |                | Tide SR                                                                                  | Hand makes a small push downwards and towards the camera, palm down (resembles a rolling wave)                                                                                                  |                                                                                            |



|                      |              |                       |                                                                                                                                                                                                                                                                                   |
|----------------------|--------------|-----------------------|-----------------------------------------------------------------------------------------------------------------------------------------------------------------------------------------------------------------------------------------------------------------------------------|
|                      | Either/Or    | Open bowl SR          | Both hands are set slightly apart, make curved bowl gesture; may or may not move back and forth                                                                                                                                                                                   |
|                      | Static       | Bracket SR            | Finger bracket: thumb and pointer finger make bracket shape, rest of hand is in a fist                                                                                                                                                                                            |
|                      |              | Ok SR                 | Thumb and index fingers make a circle. Other fingers are open                                                                                                                                                                                                                     |
|                      |              | Open O SR             | One or both hand forms a round "O" shape.                                                                                                                                                                                                                                         |
|                      |              | Pinch SR              | Thumb and pointer come about an inch apart (pinching motion)                                                                                                                                                                                                                      |
|                      |              | Pointing SR           | Finger of hand points in an intentional direction                                                                                                                                                                                                                                 |
| App description (AD) | Motion       | Clock                 | Index finger makes a choppy circular motion                                                                                                                                                                                                                                       |
|                      |              | Door knob             | Hand points to screen and rotates (all fingers facing up)                                                                                                                                                                                                                         |
|                      |              | Expansion AD          | FINGERS: 2 fingers move towards and away from each other                                                                                                                                                                                                                          |
|                      |              | Flash AD              | Fingers are constricted, then expand outwards in a flashing movement                                                                                                                                                                                                              |
|                      |              | Flip                  | <b>Flat:</b> hand is held relatively flat. Wrist then rotates to switch orientation of the hand back and forth; fingers may or may not be extended<br><b>PINCH:</b> Index and thumb of right finger are in a pinching gesture. The hand then rotates clockwise/ counterclockwise. |
|                      |              | Model exploration     | Student moves both device and qr code                                                                                                                                                                                                                                             |
|                      |              | Swipe                 | Pointer finger swipes on screen                                                                                                                                                                                                                                                   |
|                      |              | Tap                   | Index finger of hand makes a tapping motion                                                                                                                                                                                                                                       |
|                      |              | Air quotes            | Fingers make air quotes gesture                                                                                                                                                                                                                                                   |
|                      |              | Counting              | Counts off on fingers (using one hand to count on the fingers of other hand to enumerate list items)                                                                                                                                                                              |
| Miscellaneous        | Motion       | Drawing demonstration | A drawing is made and is held up to camera. Aspects of the drawing are then pointed to to illustrate different concepts                                                                                                                                                           |
|                      |              | Wax on/wax off        | Both hands make small circles towards each other with palms facing camera                                                                                                                                                                                                         |
|                      |              | 2d                    | Hand is in an flat, open formation (palm facing screen); may or may not move left and right                                                                                                                                                                                       |
|                      | Beat Gesture | Claw                  | Hand is curved, but open, almost like holding a ball                                                                                                                                                                                                                              |
|                      |              | Cycle                 | Hands move around in a cyclic motion                                                                                                                                                                                                                                              |
|                      |              | I don't know          | Hands come up to shoulders and shrug                                                                                                                                                                                                                                              |
|                      |              | True beat             | Hand is placed in front of student (palm down)                                                                                                                                                                                                                                    |

---

Wishy-washy

Hand moves loosely back and forth or  
in a circle

---
